# Supplementary material for: WRINKLED1, A Ubiquitous Regulator in Oil Accumulating Tissues from Arabidopsis Embryos to Oil Palm Mesocarp
Source: PLOS journal article supplement (doi:10.1371/journal.pone.0068887), 2013-07-26
Supplement: S9 (10.1371/journal.pone.0068887.s009) [file journal.pone.0068887.s009]

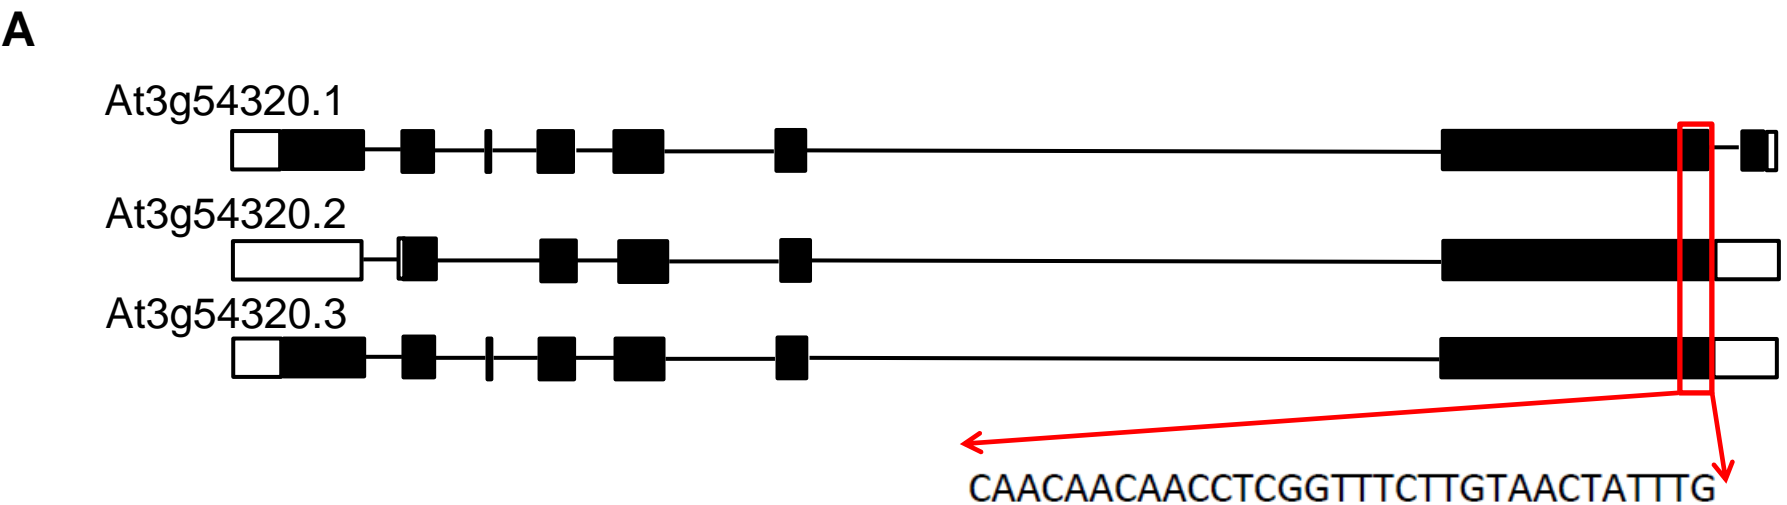

**B**

|             |                                  |                              |      |
|-------------|----------------------------------|------------------------------|------|
| At3g54320.1 | CAACAACAACCTCGGTTTCTTGTAAC TATTG | -----                        | 1412 |
| At3g54320.2 | CAACAACAACCTCGGTTTCTTGTAAC TATTG | GTCTGAGAGAGAGAGCTTTGCCTTCTAG | 1436 |
| At3g54320.3 | CAACAACAACCTCGGTTTCTTGTAAC TATTG | GTCTGAGAGAGAGAGCTTTGCCTTCTAG | 1440 |

\*\*\*\*\*

**Figure S9.** Diagnostic search sequence for *AtWR1* 3' end. **A)** The flanking sequence upstream from the last intron which is spliced out in *AtWR1* splice form 1 was chosen as a diagnostic search sequence for the 3' end splice form search. **B)** Position of the diagnostic search sequence for *WR1* 3' end is highlighted by red boxes in alignment of predicted partial cDNAs of three *AtWR1* alternative splice forms.
